# Supplementary material
Source: publisher figshare collection journal article supplement (https://acs.figshare.com/ndownloader/files/22172034)
Supplement: Supplementary file 1 [file 22172034]

Supporting Information to the manuscript:

**Diffusion of Nanoparticles with Activated Hopping  
in Crowded Polymer Solutions**

Chundong Xue,<sup>1,4,6</sup> Xinghua Shi,<sup>3,6</sup> Yu Tian,<sup>5</sup> Xu Zheng,<sup>1\*</sup> and Guoqing Hu<sup>2\*</sup>

<sup>1</sup>State Key Laboratory of Nonlinear Mechanics, Chinese Academy of Sciences, Beijing  
100190, China

<sup>2</sup>Department of Engineering Mechanics & State Key Laboratory of Fluid Power and  
Mechatronic Systems, Zhejiang University, Hangzhou 310027, China

<sup>3</sup>National Center for Nanoscience and Technology of China, Beijing 100190, China

<sup>4</sup>School of Optoelectronic Engineering and Instrumentation Science, Dalian University of  
Technology, Dalian 116024, China

<sup>5</sup>State Key Laboratory of Tribology, Tsinghua University, Beijing 100084, China

<sup>6</sup>University of Chinese Academy of Sciences, Beijing 100149, China

\*Corresponding addresses: ghu@zju.edu.cn; zhengxu@lnm.imech.ac.cn

## S1 Materials and methods

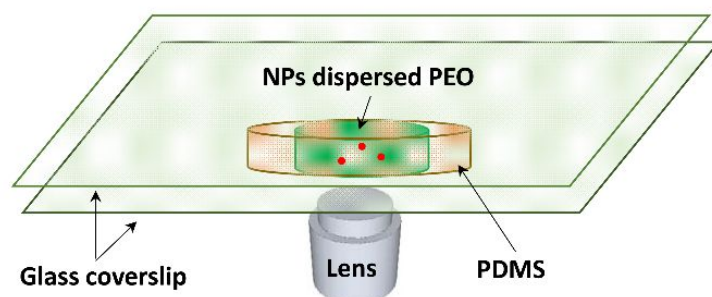

**Figure S1.** Schematic of the home-made experimental cell. The cell size is 1 cm in diameter and 2 mm in height. The coverslips and PDMS are bonded using oxygen plasma.

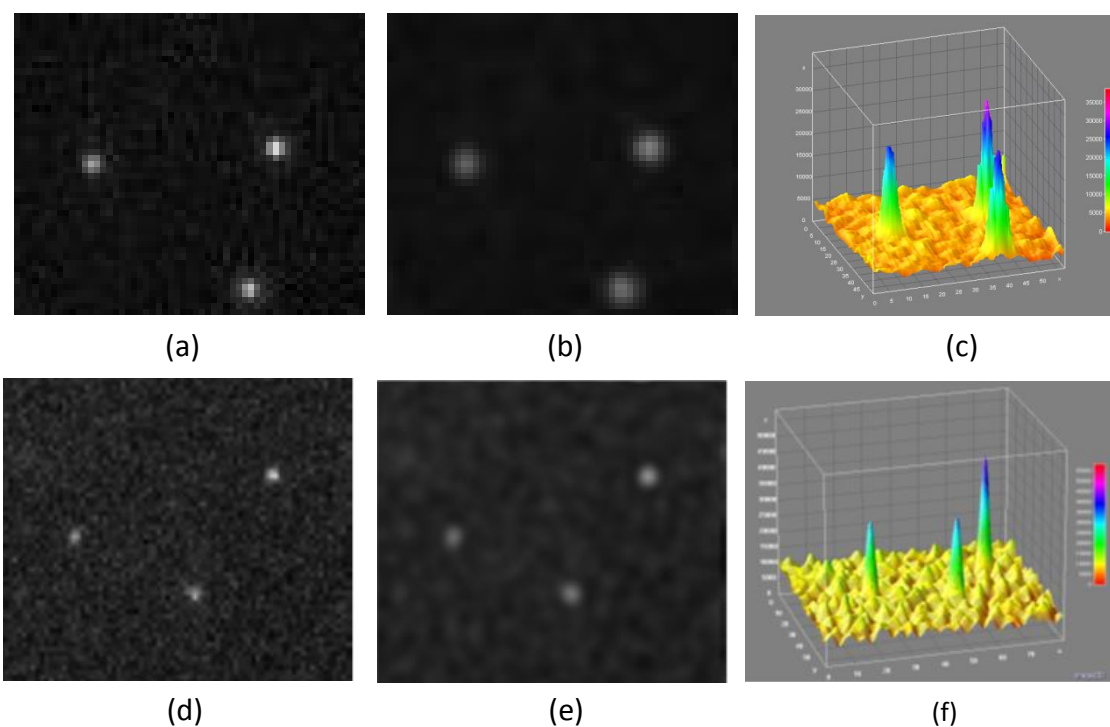

**Figure S2.** The image process of image filtering and particle identification. (a) raw image of three 100 nm NPs; (b) after noise filtering and Gaussian blur, the background noise is lowered and the grey-scale value distribution near each particle region is re-constructed; (c) very sharp peaks of particle grey-scale value distribution, which makes particle identification very easy. (d, e, f) the image process for 40 nm, corresponding to (a, b, c), respectively.

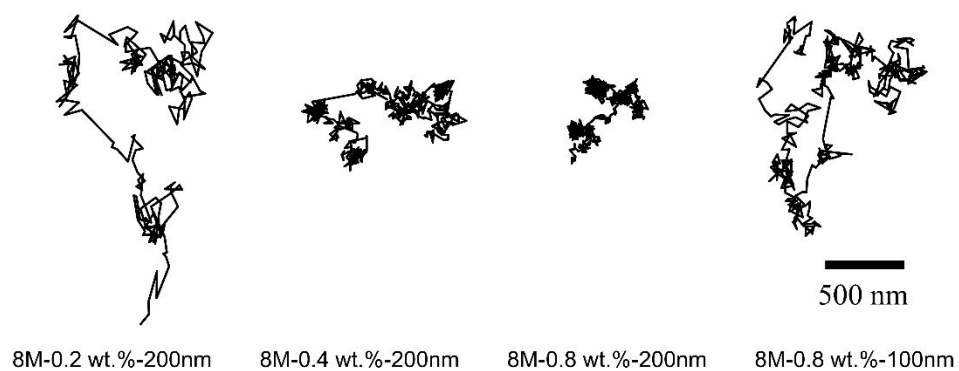

**Figure S3.** Some typical trajectories of the intermittent long-distance hops. The corresponding  $M_w$ ,  $c$  and NP diameter  $d$  are labelled below the trajectories.

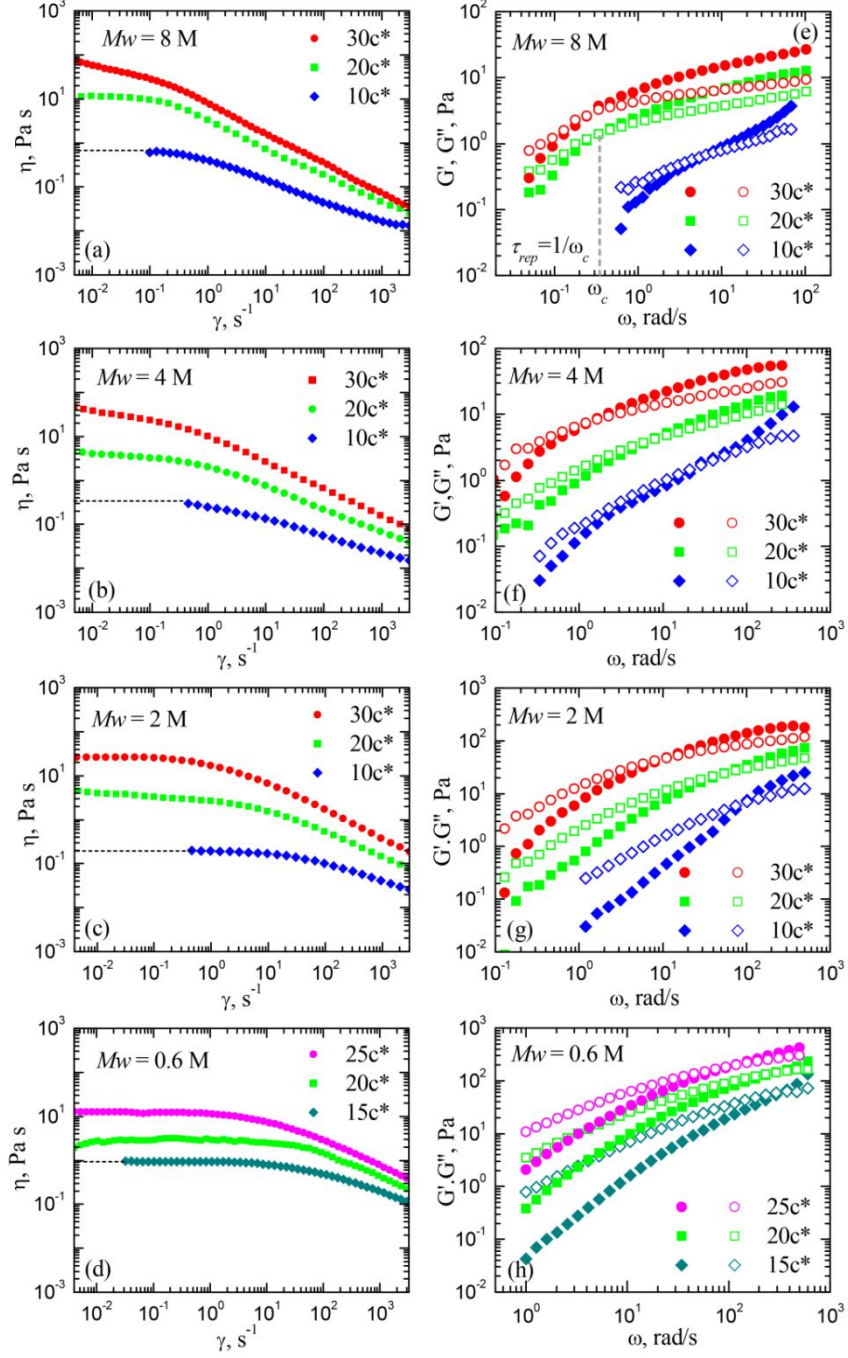

**Figure S4.** (a) - (d) The measured viscosity  $\eta$  as a function of shear rate  $\gamma$  at three concentrations for 8 M, 4 M, 2 M and 0.6 M PEO solution, respectively. (e)-(f) The measured storage  $G'$  and loss  $G''$  moduli corresponding to (a) – (d). The concentration  $c^*$  is the overlap concentration that are listed in Table S1 below. The zero shear viscosity  $\eta_{zs}$  can be extrapolated from the measured viscosity curve at about  $\gamma = 10^{-2}$  s<sup>-1</sup> for each case. The measured reptation time  $\tau_{rep}$  was identified  $\tau_{rep} = 1/\omega_c$ , where  $\omega_c$  is the angular frequency at  $G'/G'' = 1$ , as shown in panel (e).

**Tube diameter  $d_t$  and average mesh size  $\xi$ .** For PEO solutions, the gyration radius can be obtained using  $R_g = 0.02M_w^{0.58}$  [nm],<sup>1</sup> and the overlap concentration is then calculated by  $c^* = 3M_w/4\pi R_g^3 N_A$ , where  $N_A$  is the Avogadro constant.<sup>2</sup> The tube diameter is calculated as  $d_t(c) = d_t(1)c^{-\nu/(3\nu-1)}$ , where  $d_t(1) \approx 4$  nm and  $\nu \approx 0.588$  is the Flory exponent. The calculated values of  $d_t$  for various  $M_w$  and  $c$  are listed in Table S1 (note that the concept of tube diameter is only valid for entangle solutions where  $c > 7c^*$ ). To compare, the correlation lengths  $\xi = R_g(c/c^*)^{-0.76}$  when  $c = 5c^*$  that represent the average mesh size of PEO networks are also listed.<sup>2</sup> From Table S1, we can see that the NP's sizes  $d$  in current experiments are usually comparable to or larger than PEO tube diameters  $d_t$ , and  $d$  are much larger than the average mesh sizes  $\xi$ .

**Table S1.** The calculated values of tube diameters  $d_t$  and averages mesh sizes  $\xi$  for various  $M_w$  and  $c$ .

| $M_w$<br>[g/mol] | $c^*$<br>[wt.%] | $d_t$ [nm] |         |         |         | $\xi$ [nm] |
|------------------|-----------------|------------|---------|---------|---------|------------|
|                  |                 | $10c^*$    | $20c^*$ | $30c^*$ | $40c^*$ | $5c^*$     |
| <b>8 M</b>       | 0.04            | 251        | 150     | 110     | 89      | 59         |
| <b>4 M</b>       | 0.065           | 175        | 104     | 77      | 62      | 40         |
| <b>2 M</b>       | 0.10            | 126        | 75      | 55      | 45      | 26         |
| <b>1 M</b>       | 0.18            | 81         | 48      | 36      | 29      | 18         |
| <b>0.6 M</b>     | 0.26            | 62         | 37      | 27      | 22      | 13         |
| <b>0.3 M</b>     | 0.44            | 42         | 25      | 18      | 15      | 9          |

## S2 Determination of reptation time $\tau_{rep}$ and plateau modulus $G_e$

From the measured curves of Figure S4 (viscosity vs. shear rate), the “zero shear” viscosity  $\eta_{zs}$  can be approximately extrapolated at very low shear rate ( $10^{-2}$  s<sup>-1</sup>). For each  $M_w$ , the values of  $\eta_{zs}$  show similar concentration scaling as  $\eta_{zs} \sim c^\beta$ , and the exponents of  $\beta$  are consistent with

theoretically predicted value of 3.9.<sup>3</sup> From the measured curves of moduli, we can see that at low frequencies  $G'' > G'$  and  $G'' \sim \omega$ , while at high frequencies  $G' > G''$ . According to the Maxwell model of a viscoelastic fluid, the measured reptation time  $\tau_{rep}$  was identified as the reciprocal of the angular frequency  $\omega$  where  $G'/G'' = 1$ , as shown in Figure S4e. Some specific values of the measured reptation time  $\tau_{rep}$  are listed in Table S2, in which the corresponding values of crossover time  $\tau_c$  are also given for contrast. The measured  $\tau_{rep}$  for various  $Mw$  and  $c$  are presented in Figure 2d, where they always show good agreement with the theoretical prediction  $\tau_{rep} = \tau_0 N^3 / N_e(1) c^{3(1-\nu)/(3\nu-1)}$ .<sup>3, 4</sup> In this theoretical formula,  $\tau_0 \approx 0.2$  ns is the monomer relaxation time at room temperature,  $N = (\varepsilon Mw) / M_0$  is the number of Kuhn monomers per chain, and  $N_e(1) \approx 14$  is the Kuhn monomer per entanglement in the melt. For PEO, the Kuhn monomer molar mass  $M_0 = 140$ , and a coefficient  $\varepsilon = 0.8$  of the ratio between the actual  $Mw$  and the nominal  $Mw$  is introduced in actual calculation.

**Table S2.** Typical values of  $\tau_c$  and  $\tau_{rep}$  for 200 nm NP.

| $Mw$ [g/mol] |              | $\tau$ [s] |         |         |
|--------------|--------------|------------|---------|---------|
|              |              | $10c^*$    | $20c^*$ | $30c^*$ |
| <b>8 M</b>   | $\tau_c$     | 0.030      | 0.16    | 0.22    |
|              | $\tau_{rep}$ | 0.19       | 3.03    | 4.09    |
| <b>2 M</b>   | $\tau_c$     | 0.0043     | 0.0054  | 0.023   |
|              | $\tau_{rep}$ | 0.015      | 0.026   | 0.11    |
| <b>1 M</b>   | $\tau_c$     | 0.0037     | 0.0047  | 0.028   |
|              | $\tau_{rep}$ | 0.0098     | 0.019   | 0.052   |

The plateau modulus  $G_e$  was then evaluated as  $G_e = \eta_{zs} / \tau_{rep}$ .<sup>5-8</sup> The experimentally obtained  $G_e$  values are well consistent with the theoretical prediction  $G_e = k_B T / L^3$  ( $L^3 = d_i \zeta^2$ ),<sup>3, 7, 9</sup> as shown in Figure S5.

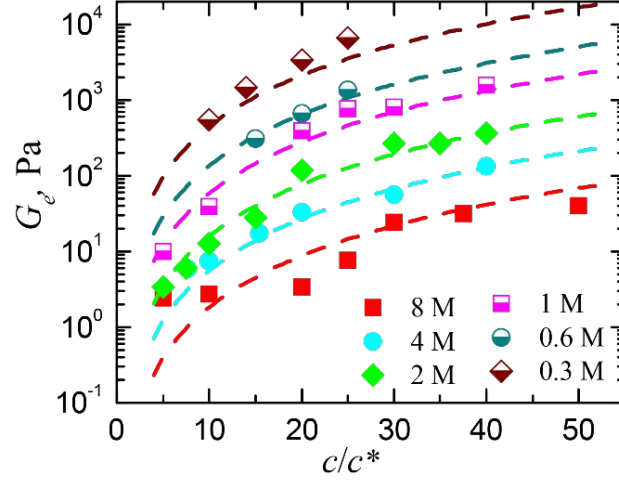

**Figure S5.** The experimentally obtained plateau moduli  $G_e$  as a function of normalized concentrations for 8 M, 4 M, 2 M, 1 M, 0.6 M and 0.3 M PEO, respectively. The dashed curves are the theoretical predictions based on  $G_e = k_B T / L^3$  for each  $M_w$ .

### S3 Calculation of the hopping time $\tau_{hop}$

Two counterintuitive experimental findings mentioned above should be emphasized here: 1) an earlier transition from sub-diffusive regime to long-time linear regime, and 2) an enhanced diffusivity in entangled solutions with higher  $M_w$ . These are attributed to the existence of an activated hopping of “large” NP subjected to the constraint of crowded polymer networks. Figure 3c illustrates these effects. Based on these facts, we propose our approach to calculate the typical hopping timescale  $\tau_{hop}$ .

The measured MSD  $\langle r^2(t) \rangle_{exp}$  manifests an earlier transition ( $\tau_c$ ) and deviates from the prediction based on long-time reptation due to hopping. According to the fits based on Maxwell model (which is valid for Maxwell fluids such as PEO solutions and is consistent with the generalized Stokes-Einstein relation) as shown in Figure 2b in the main text, the long-time linear part of the measured MSD can be expressed as:

$$\langle r^2(t) \rangle_{exp} \approx \frac{k_B T}{\pi d G_e} \frac{t}{\tau_c} \quad (S1)$$

In addition, the presence of hopping introduces an additional contribution on the MSD. The linear part of the measured MSD is then actually a sum of two parts:<sup>10</sup>

$$\langle r^2(t) \rangle_{exp} = \langle r^2(t) \rangle_{rep} + \langle r^2(t) \rangle_{hop} \quad (S2)$$

The Maxwell model also assumes a linear MSD scaling at long-time stage since  $t > \tau_{rep}$ :

$$\langle r^2(t) \rangle_{rep} \approx \frac{k_B T}{\pi d G_e} \frac{t}{\tau_{rep}} \quad (S3)$$

Using  $\tau_{hop}$  as the typical timescale of hopping, the MSD resulted from hopping dynamics can be similarly written as:

$$\langle r^2(t) \rangle_{hop} \approx \frac{k_B T}{\pi d G_e} \frac{t}{\tau_{hop}} \quad (S4)$$

Thus, one obtains the equation of  $\tau_{hop}$ :

$$\frac{1}{\tau_{hop}} = \frac{1}{\tau_c} - \frac{1}{\tau_{rep}} \quad (S5)$$

Based on Equation S5, all the measured values of  $\tau_{hop}$  can be calculated, as listed in Table S3.

**Table S3.** The calculated values of  $\tau_{hop}$  of 200 nm NP for various PEO  $M_w$  and  $c$

| $M_w$<br>[g/mol] | $c^*$<br>[wt. %] | $\tau_{hop}$ [s] |        |       |       |
|------------------|------------------|------------------|--------|-------|-------|
|                  |                  | 10c*             | 20c*   | 30c*  | 40c*  |
| <b>8 M</b>       | 0.040            | 0.035            | 0.17   | 0.23  | 0.34  |
| <b>4 M</b>       | 0.065            | 0.0051           | 0.015  | 0.041 | 0.099 |
| <b>2 M</b>       | 0.10             | 0.0059           | 0.0068 | 0.030 | 0.075 |
| <b>1 M</b>       | 0.18             | 0.0058           | 0.0062 | 0.061 | 0.073 |

Also, as mentioned in Figure 1b, we measured the mean time interval between successive hops. For each cases, we used data containing hundreds of NPs to get the statistical mean value of  $\Delta t_{hop}$ . Table S4 displays the measured values of  $\Delta t_{hop}$ , which shows the good agreement with the values of  $\tau_{hop}$  obtained by our approach. The measured value of the hopping interval is significantly dependent on the observation time resolution and requires a large number of data to



achieve a reliable statistical result. As a result, we can only measure  $\Delta t_{\text{hop}}$  for the case of large  $MW$  and  $c$ .

**Table S4.** Several measured values of  $\Delta t_{\text{hop}}$  for 200 nm NP.

| $Mw$<br>[g/mol] | $c^*$<br>[wt.%] | $\Delta t_{\text{hop}}$ |         |         |
|-----------------|-----------------|-------------------------|---------|---------|
|                 |                 | $20c^*$                 | $30c^*$ | $40c^*$ |
| 8 M             | 0.040           | 0.11                    | 0.25    | 0.45    |
| 4 M             | 0.065           | 0.03                    | 0.05    | 0.11    |

#### S4 Estimation of the measurement uncertainty

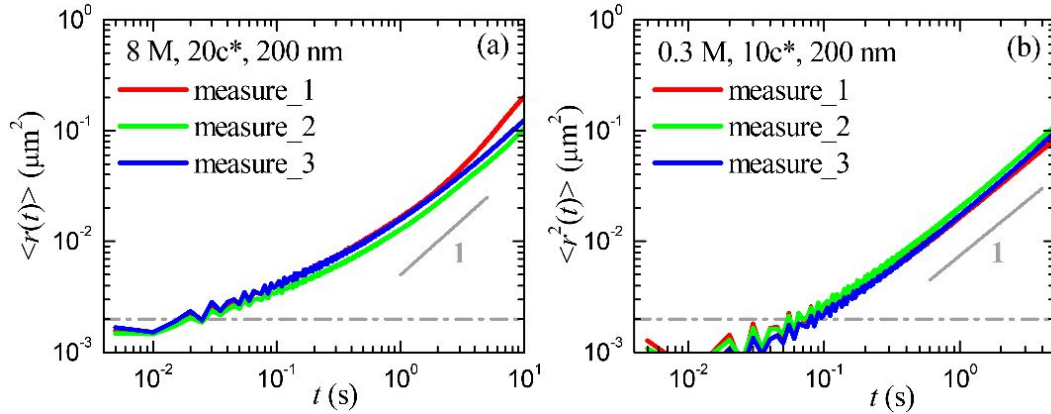

**Figure S6.** The three independent measurements of MSD for 200 nm NP in (a) 8 M ( $c = 20c^*$ ), and (b) 0.3 M ( $c = 10c^*$ ) PEO, respectively. Grey dash-dot lines represent the cutoff value of  $0.002 \mu\text{m}^2$ .

In current particle tracking measurement, the centroid resolution is about  $\theta \approx 0.2$  pixel by refining the locations of the local maxima of intensity (Figure S2), thus the uncertainty of the measured MSD is principally  $2\theta^2 \approx 0.002 \mu\text{m}^2$ . In Figure 2A, the measured MSD of  $20c^*$  - 8 M below this cutoff value shows some fluctuation at short times  $t \leq 0.1$  s. However, this fluctuation will not introduce large uncertainty into determining  $\tau_c$  by fitting the Maxwell model with data

from short times to long times. All the results of other  $Mws$  also satisfy this argument. For most situations, we performed three independent experiments. As shown in Figure S6, the divergences among the three measurements are small. To cover the uncertainty at the largest degree, we estimate that the measurement uncertainty of MSD is within 30% of its average value in the short-time region. The overall estimation of the uncertainty of MSD and  $\tau_c$  are estimated to be about 15%.

In the bulk rheological measurement, the cross points of  $G'$  and  $G''$  (coordinate value corresponding to  $1/\tau_{rep}$ ) in different measurements vary slightly. Taking 8M, 20c\* PEO as example, in three different measurements, we obtain  $\tau_{rep} \approx 1.67, 3.03$  and  $4.09$ , respectively. Accordingly, we estimate that the uncertainty of  $\tau_{rep}$  is about 40% of its average value based on the standard deviation of the data.

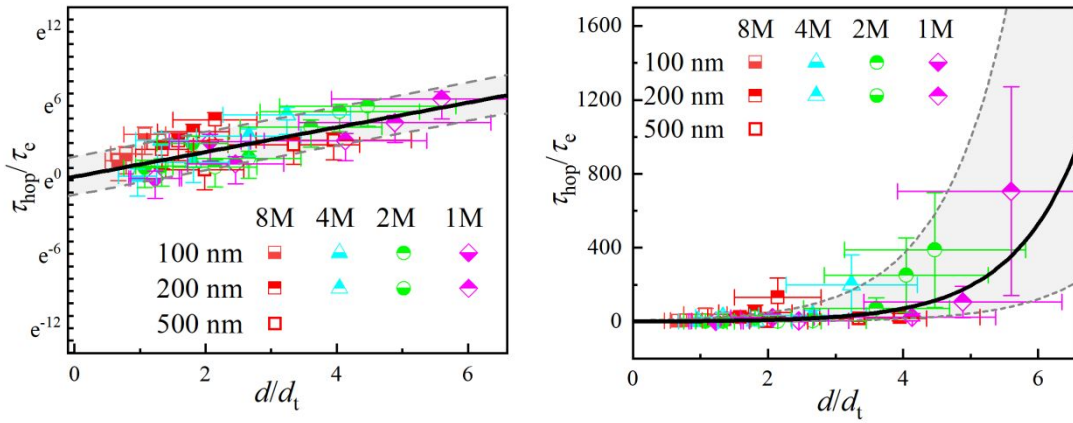

**Figure S7** A plot of Figure 5 with error bars and the marked upper and lower bounds to show the tendency (left), and a linear plot of Figure 5 (right). The error bars represent the measured uncertainties.

We introduce here the uncertainty analysis of other measured data based on uncertainty propagation. For instance, based on the equation  $\tau_{rep} = \tau_0(N^3/N_e(1))c^{3(1-\nu)/(3\nu-1)} \sim c^{1.5}Mw^3$ , the relative uncertainty of  $\tau_{rep}$ , written as  $\delta\tau_{rep}/\tau_{rep}$ , is estimated to be about 40% by the propagation of the uncertainties from  $c$  ( $\delta c/c \sim 10\%$ ) and  $Mw$  ( $\delta Mw/Mw \sim 10\%$ ). Then the uncertainty of  $\tau_{hop}$  can be roughly estimated to be 60% according to  $1/\tau_{hop} \sim 1/\tau_c - 1/\tau_{rep}$ . By the same approach, we obtain the uncertainties of the variables  $\tau_{hop}/\tau_c$  and  $d/d_t$  in Fig. 5 to be up to 80% and 30%, respectively. In Table S5, we list the estimations for all the involved parameters. Then we can plot the error bars and the upper and lower bounds with the data of Fig. 5 to show the good tendency in Figure S7. A linear plot with the data from Fig. 5 and the error bars estimated above is also provided to show the data are actually within an exponential tendency.

**Table S5.** Estimation of the relative uncertainties

| variable    | $d$   | $c$   | $Mw$ | $d_t$  | $\tau_c$ | $\tau_e$ |
|-------------|-------|-------|------|--------|----------|----------|
| uncertainty | 5-10% | 5-10% | 10%  | 20-25% | 15%      | 20%      |

  

| variable    | $\tau_{rep}$ | $\tau_{hop}$ | $\tau_{hop}/\tau_e$ | $d/d_t$ |
|-------------|--------------|--------------|---------------------|---------|
| uncertainty | 40%          | 60%          | 80%                 | 30%     |

## References

1. Omari, R. A.; Aneese, A. M.; Grabowski, C. A.; Mukhopadhyay, A. Diffusion of Nanoparticles in Semidilute and Entangled Polymer Solutions. *The Journal of Physical Chemistry. B* 2009, 113, 8449-8452.
2. de Gennes, P.-G. *Scaling Concepts in Polymer Physics*. Cornell University Press: Ithaca, 1979.
3. Rubinstein, M.; Colby, R. H. *Polymer Physics*. Oxford University Press: New York, 2003.
4. de Kort, D. W.; Rombouts, W. H.; Hoebe, F. J. M.; Janssen, H. M.; Van As, H.; van Duynhoven, J. P. M. Scaling Behavior of Dendritic Nanoparticle Mobility in Semidilute Polymer Solutions. *Macromolecules* 2015, 48, 7585-7591.
5. Sprakel, J.; van der Gucht, J.; Cohen Stuart, M. A.; Besseling, N. A. Brownian Particles in Transient Polymer Networks. *Phys Rev E Stat Nonlin Soft Matter Phys* 2008, 77, 061502.
6. Larson, R. G. *The Structure and Rheology of Complex Fluids*. Oxford University Press: New York, 1999.
7. Guo, H.; Bourret, G.; Lennox, R. B.; Sutton, M.; Harden, J. L.; Leheny, R. L. Entanglement-controlled Subdiffusion of Nanoparticles within Concentrated Polymer Solutions. *Phys Rev Lett* 2012, 109, 055901.
8. van Zanten, J. H.; Amin, S.; Abdala, A. A. Brownian Motion of Colloidal Spheres in Aqueous PEO Solutions. *Macromolecules* 2004, 37, 3874-3880.
9. Doi, M.; Edwards, S. F. *The Theory of Polymer Dynamics*. Oxford University Press: New York, 1988.
10. Cai, L. H.; Panyukov, S.; Rubinstein, M. Hopping Diffusion of Nanoparticles in Polymer Matrices. *Macromolecules* 2015, 48, 847-862.
